# Supplementary material
Source: Springer Nature journal article supplement (https://www.springermedizin.de/resource/supplementary/12885_2012_3803_MOESM7_ESM.pdf/9464428)

**A**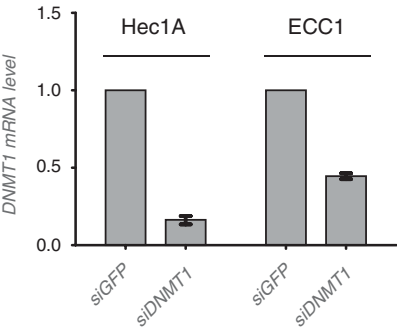**B**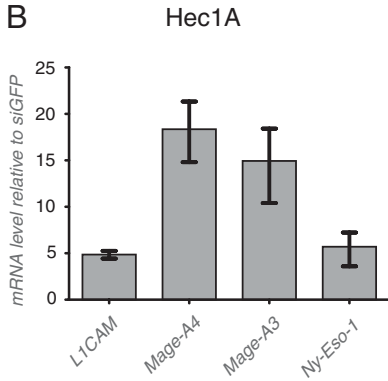**ECC1**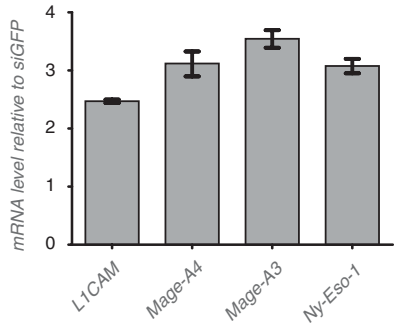**C**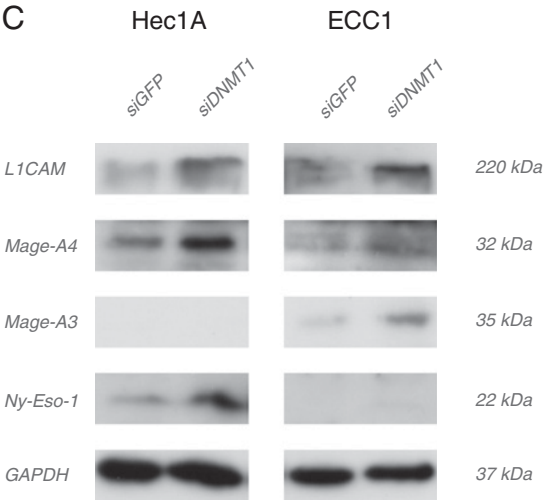

Supplement: MOESM7 [file 9464428]
